# Supplementary material for: Chlorhexidine–Alcohol versus Povidone–Iodine for Surgical-Site Antisepsis
Source: Atypon-hosted journal article supplement (doi:10.1056/nejmoa0810988), 2010-01-06
Supplement: nejm_darouiche_18sa1.pdf [file nejm_darouiche_18sa1.pdf]

## Supplementary Appendix

This appendix has been provided by the authors to give readers additional information about their work.

Supplement to: Darouiche RO, Wall MJ Jr, Itani KMF, et al. Chlorhexidine–alcohol versus povidone–iodine for surgical-site antisepsis. *N Engl J Med* 2010;362:18-26.

**Table 1 (full). Baseline Characteristics of Patients (Intention-to-Treat Population). \***

|                              | <b>Chlorhexidine-<br/>Alcohol<br/>(n=409)</b> | <b>Povidone-<br/>Iodine<br/>(n=440)</b> | <b>P-Value†</b> |
|------------------------------|-----------------------------------------------|-----------------------------------------|-----------------|
| Male sex - %                 | 58.9                                          | 55.9                                    | 0.40            |
| Age - years                  |                                               |                                         | 0.87            |
| Mean                         | 53.3±14.6                                     | 52.9±14.2                               |                 |
| Range                        | 18 to 100                                     | 19 to 85                                |                 |
| Gastrointestinal disease - % | 67.0                                          | 65.0                                    | 0.56            |
| Cardiopulmonary disease - %  | 33.5                                          | 37.1                                    | 0.28            |
| Gynecological disease - %    | 13.0                                          | 12.1                                    | 0.76            |
| Neurologic disease - %       | 12.5                                          | 10.0                                    | 0.28            |
| Renal disease - %            | 7.3                                           | 8.4                                     | 0.61            |
| Immunologic disease - %      | 4.7                                           | 4.8                                     | >0.99           |
| Cancer - %                   | 58.0                                          | 61.4                                    | 0.33            |
| Diabetes mellitus- %         | 15.4                                          | 13.9                                    | 0.56            |
| Malnutrition - %††           | 6.1                                           | 5.2                                     | 0.66            |
| Liver cirrhosis - %          | 2.2                                           | 3.0                                     | 0.52            |
| History of Alcohol abuse - % | 17.9                                          | 19.3                                    | 0.60            |

**Table 1 (full). Baseline Characteristics of Patients (Intention-to-Treat Population). \***

|                                       | <b>Chlorhexidine-<br/>Alcohol<br/>(n=409)</b> | <b>Povidone-<br/>Iodine<br/>(n=440)</b> | <b>P-Value†</b> |
|---------------------------------------|-----------------------------------------------|-----------------------------------------|-----------------|
| History of smoking - %                | 37.2                                          | 34.6                                    | 0.43            |
| Mechanical ventilation - %            | 0.2                                           | 0.5                                     | >0.99           |
| Documented colonization with MRSA - % | 2.0                                           | 2.3                                     | 0.81            |
| Systemic antibiotics                  |                                               |                                         |                 |
| Initiated preoperatively - %          | 100.0                                         | 100.0                                   | >0.99           |
| Type of antibiotics                   |                                               |                                         |                 |
| Cephalosporin - %                     | 73.3                                          | 74.3                                    | 0.76            |
| Glycopeptide - %                      | 12                                            | 12.7                                    | 0.76            |
| Nitroimidazole - %                    | 9.0                                           | 9.1                                     | >0.99           |
| Aminoglycoside - %                    | 7.1                                           | 10.2                                    | 0.11            |
| Carbapenem - %                        | 7.3                                           | 6.1                                     | 0.50            |
| Penicillin - %                        | 3.2                                           | 3.9                                     | 0.71            |
| Macrolide - %                         | 2.2                                           | 2.7                                     | 0.66            |
| Fluoroquinolone - %                   | 2.7                                           | 1.8                                     | 0.49            |

**Table 1 (full). Baseline Characteristics of Patients (Intention-to-Treat Population). \***

|                                   | <b>Chlorhexidine-<br/>Alcohol<br/>(n=409)</b> | <b>Povidone-<br/>Iodine<br/>(n=440)</b> | <b>P-Value†</b> |
|-----------------------------------|-----------------------------------------------|-----------------------------------------|-----------------|
| Monobactam - %                    | 2.4                                           | 0.7                                     | 0.05            |
| Tetracycline - %                  | 0.2                                           | 0.5                                     | >0.99           |
| Duration of administration – days |                                               |                                         | >0.99           |
| Mean                              | 1.1± 1.2                                      | 1.1 ± 0.8                               |                 |
| Range                             | 1 to 20                                       | 1 to 11                                 |                 |
| Initiated postoperatively - %     | 51.7                                          | 48.9                                    | 0.41            |
| Duration of surgery – hours       |                                               |                                         | >0.99           |
| Mean                              | 3.0±1.5                                       | 3.0±1.5                                 |                 |
| Range                             | 0.5 to 10.0                                   | 0.3 to 12.0                             |                 |
| Abdominal surgery - %             | 72.6                                          | 70.0                                    | 0.41            |
| Colorectal - %                    | 45.5                                          | 43.4                                    | 0.58            |
| Biliary - %                       | 10.8                                          | 12.3                                    | 0.52            |
| Small intestinal - %              | 10.0                                          | 7.7                                     | 0.28            |
| Gastroesophageal - %              | 6.4                                           | 6.6                                     | 0.89            |
| Non-abdominal surgery - %         | 27.4                                          | 30.0                                    | 0.41            |

| <b>Table 1 (full). Baseline Characteristics of Patients (Intention-to-Treat Population). *</b>                              |                                               |                                         |                 |
|-----------------------------------------------------------------------------------------------------------------------------|-----------------------------------------------|-----------------------------------------|-----------------|
|                                                                                                                             | <b>Chlorhexidine-<br/>Alcohol<br/>(n=409)</b> | <b>Povidone-<br/>Iodine<br/>(n=440)</b> | <b>P-Value†</b> |
| Thoracic - %                                                                                                                | 10.8                                          | 13.0                                    | 0.34            |
| Gynecologic - %                                                                                                             | 10.3                                          | 9.1                                     | 0.56            |
| Urologic - %                                                                                                                | 6.4                                           | 8.0                                     | 0.42            |
| Preoperative shower (overall) - %                                                                                           | 26.7                                          | 27.0                                    | 0.94            |
| With 4% chlorhexidine gluconate - %                                                                                         | 16.1                                          | 18.9                                    | 0.32            |
| With 10% povidone-iodine - %                                                                                                | 7.3                                           | 5.2                                     | 0.26            |
| With soap bar (0.6% triclocarban) - %                                                                                       | 3.2                                           | 3.0                                     | >0.99           |
| * Plus-minus values are means $\pm$ SD.                                                                                     |                                               |                                         |                 |
| † P-values were based on Fisher's exact test for categorical variables and Wilcoxon Rank Sum test for continuous variables. |                                               |                                         |                 |
| †† Malnutrition defined as >10% decrease in weight over 2 months.                                                           |                                               |                                         |                 |

**Table 2. Systemic Prophylactic Antibiotics for Colorectal Surgery (Intention-to-Treat Population).**

|                     | <b>Chlorhexidine-Alcohol</b> | <b>Povidone-Iodine</b> |                 |
|---------------------|------------------------------|------------------------|-----------------|
|                     | <b>(n=186)</b>               | <b>(n=191)</b>         | <b>P-Value*</b> |
| Cephalosporin - %   | 64.5                         | 67.5                   | 0.59            |
| Glycopeptide - %    | 10.2                         | 11.0                   | 0.87            |
| Nitroimidazole - %  | 16.1                         | 14.7                   | 0.78            |
| Aminoglycoside - %  | 14.5                         | 17.3                   | 0.48            |
| Carbapenem - %      | 15.1                         | 13.6                   | 0.77            |
| Penicillin - %      | 3.8                          | 3.7                    | >0.99           |
| Macrolide - %       | 3.2                          | 4.2                    | 0.79            |
| Fluoroquinolone - % | 2.7                          | 1.6                    | 0.50            |
| Monobactam - %      | 1.1                          | 0                      | 0.24            |
| Tetracycline - %    | 0.5                          | 0.5                    | >0.99           |

\*P-values were based on Fisher's exact test.

**Table 3. Univariate and Multivariate Analyses of Any Surgical Site Infection (Intention-to-Treat Population).**

| Factor                                             | Univariate Analysis |              |          | Multivariate Analysis |              |          |
|----------------------------------------------------|---------------------|--------------|----------|-----------------------|--------------|----------|
|                                                    | Odds Ratio          | 95% CI       | P-Value* | Odds Ratio            | 95% CI       | P-Value† |
| Use of chlorhexidine-alcohol (vs. povidone-iodine) | 0.55                | (0.36- 0.83) | 0.004    | 0.45                  | (0.26- 0.78) | 0.004    |
| Abdominal surgery (vs. non-abdominal)              | 4.63                | (2.38- 9.04) | <0.001   | 3.21                  | (1.60- 6.42) | 0.001    |
| ASA score of 4 (vs. score of 1)                    | 15.43               | (3.55-67.01) | <0.001   | 4.99                  | (0.33-74.55) | 0.24     |
| ASA score of 3 (vs. score of 1)                    | 5.63                | (1.35-23.51) | 0.006    | 1.81                  | (0.15-22.15) | 0.64     |
| ASA score of 2 (vs. score of 1)                    | 2.78                | (0.62-12.47) | 0.25     | 2.05                  | (0.25-16.47) | 0.50     |
| Age (per year)                                     | 1.02                | (1.01- 1.03) | 0.003    | 1.00                  | (0.98- 1.02) | 0.78     |
| Female sex (vs. male sex)                          | 0.59                | (0.38- 0.90) | 0.02     | 0.87                  | (0.69- 1.09) | 0.21     |
| Alcohol abuse                                      | 1.11                | (0.67- 1.83) | 0.69     | 1.12                  | (1.05- 1.19) | <0.001   |
| Liver cirrhosis                                    | 3.28                | (1.31- 8.24) | 0.02     | 2.14                  | (1.15- 3.99) | 0.02     |
| Immunologic disease                                | 2.72                | (1.32- 5.62) | 0.01     | 1.79                  | (1.00- 3.22) | 0.05     |

**Table 3. Univariate and Multivariate Analyses of Any Surgical Site Infection (Intention-to-Treat Population).**

| Factor                                              | Univariate Analysis |              |          | Multivariate Analysis |              |          |
|-----------------------------------------------------|---------------------|--------------|----------|-----------------------|--------------|----------|
|                                                     | Odds Ratio          | 95% CI       | P-Value* | Odds Ratio            | 95% CI       | P-Value† |
| Cancer                                              | 2.05                | (1.31- 3.21) | 0.002    | 1.65                  | (1.04- 2.64) | 0.03     |
| Diabetes mellitus                                   | 1.90                | (1.16- 3.11) | 0.01     | 1.75                  | (1.05- 2.92) | 0.03     |
| Malnutrition ††                                     | 3.02                | (1.57- 5.84) | 0.003    | 2.62                  | (1.23- 5.55) | 0.01     |
| Gastrointestinal disease                            | 2.96                | (1.75- 5.01) | <0.001   | 1.27                  | (1.00- 1.61) | 0.05     |
| Infection at another bodily site (vs. no infection) | 0.92                | (0.32- 2.68) | 1.00     | 0.89                  | (0.50- 1.58) | 0.68     |
| Duration of surgery (per hour)                      | 1.33                | (1.17- 1.51) | <0.001   | 1.11                  | (1.02- 1.21) | 0.01     |
| Days that surgical drain was in place (per day)     | 1.03                | (1.00- 1.06) | 0.02     | 1.04                  | (1.02- 1.05) | <0.001   |
| Preop shower with chlorhexidine (vs. no shower)     | 1.56                | (0.57- 4.25) | 0.38     | 0.95                  | (0.78- 1.15) | 0.19     |
| Preop shower with povidone-iodine (vs. no shower)   | 0.13                | (0.02- 0.92) | 0.01     | 0.36                  | (0.32- 0.39) | <0.001   |
| Preop shower with soap (vs. no shower)              | 1.08                | (0.65- 1.82) | 0.79     | 0.96                  | (0.75- 1.21) | 0.72     |

| <b>Table 3. Univariate and Multivariate Analyses of Any Surgical Site Infection (Intention-to-Treat Population).</b> |                            |               |                 |                              |               |                 |
|----------------------------------------------------------------------------------------------------------------------|----------------------------|---------------|-----------------|------------------------------|---------------|-----------------|
| <b>Factor</b>                                                                                                        | <b>Univariate Analysis</b> |               |                 | <b>Multivariate Analysis</b> |               |                 |
|                                                                                                                      | <b>Odds</b>                |               |                 | <b>Odds</b>                  |               |                 |
|                                                                                                                      | <b>Ratio</b>               | <b>95% CI</b> | <b>P-Value*</b> | <b>Ratio</b>                 | <b>95% CI</b> | <b>P-Value†</b> |

\* P-values for the univariate analyses were computed with use of Fisher’s exact test for categorical variables and a logistic regression model that adjusted for hospital site as a random effect (GEE method) for continuous variables.

†P-values for the multivariate analysis were computed with use of a logistic regression model that included all terms and adjusted for hospital site as a random effect (GEE method).

†† Malnutrition defined as >10% decrease in weight over 2 months.

| <b>Table 4. Microbiology of Infections with Documented Causative Pathogens According to Study Group and Type of Infection (Intention-to-Treat Population).*</b> |                              |                   |                  |                   |                        |                   |                  |                   |                   |
|-----------------------------------------------------------------------------------------------------------------------------------------------------------------|------------------------------|-------------------|------------------|-------------------|------------------------|-------------------|------------------|-------------------|-------------------|
| <b>No. of Isolates</b>                                                                                                                                          |                              |                   |                  |                   |                        |                   |                  |                   |                   |
| <b>(n=107)</b>                                                                                                                                                  |                              |                   |                  |                   |                        |                   |                  |                   |                   |
| <b>Organism</b>                                                                                                                                                 | <b>Chlorhexidine-Alcohol</b> |                   |                  |                   | <b>Povidone-Iodine</b> |                   |                  |                   | <b>Both</b>       |
|                                                                                                                                                                 | <b>Type of Infection</b>     |                   |                  |                   |                        |                   |                  |                   |                   |
|                                                                                                                                                                 | <b>Superficial</b>           | <b>Deep</b>       | <b>Organ-</b>    |                   | <b>Superficial</b>     | <b>Deep</b>       | <b>Organ-</b>    |                   |                   |
|                                                                                                                                                                 | <b>Incisional</b>            | <b>Incisional</b> | <b>Space</b>     | <b>Any</b>        | <b>Incisional</b>      | <b>Incisional</b> | <b>Space</b>     | <b>Any</b>        | <b>Any</b>        |
|                                                                                                                                                                 | <b>(12 cases)</b>            | <b>(3 cases)</b>  | <b>(8 cases)</b> | <b>(23 cases)</b> | <b>(19 cases)</b>      | <b>(9 cases)</b>  | <b>(9 cases)</b> | <b>(37 cases)</b> | <b>(60 cases)</b> |
| Gram-positive aerobic bacteria                                                                                                                                  |                              |                   |                  |                   |                        |                   |                  |                   |                   |
| <i>Staphylococcus aureus</i> †                                                                                                                                  | 7                            | 0                 | 1                | 8                 | 12                     | 2                 | 2                | 16                | 24                |
| <i>Staphylococcus epidermidis</i> ‡                                                                                                                             | 4                            | 1                 | 0                | 5                 | 4                      | 2                 | 1                | 7                 | 12                |
| Enterococci                                                                                                                                                     | 3                            | 1                 | 2                | 6                 | 2                      | 2                 | 2                | 6                 | 12                |
| Streptococci                                                                                                                                                    | 0                            | 0                 | 1                | 1                 | 5                      | 3                 | 2                | 10                | 11                |
| Corynebacteria‡                                                                                                                                                 | 2                            | 0                 | 0                | 2                 | 1                      | 0                 | 1                | 2                 | 4                 |
| Gram-negative aerobic bacteria                                                                                                                                  |                              |                   |                  |                   |                        |                   |                  |                   |                   |
| <i>Escherichia coli</i>                                                                                                                                         | 1                            | 1                 | 1                | 3                 | 1                      | 0                 | 0                | 1                 | 4                 |
| <i>Klebsiella pneumoniae</i>                                                                                                                                    | 1                            | 0                 | 1                | 2                 | 1                      | 1                 | 0                | 2                 | 4                 |

|                      |   |   |   |   |   |   |   |   |    |
|----------------------|---|---|---|---|---|---|---|---|----|
| Enterobacter species | 0 | 0 | 2 | 2 | 0 | 0 | 2 | 2 | 4  |
| Anaerobic bacteria   |   |   |   |   |   |   |   |   |    |
| Bacteroides species  | 3 | 2 | 2 | 7 | 1 | 2 | 2 | 5 | 12 |
| Fungi                |   |   |   |   |   |   |   |   |    |
| Candida species      | 0 | 0 | 0 | 0 | 0 | 3 | 1 | 4 | 4  |

\* This table lists only organisms that were isolated from >5% of cases (3 cases) of infection with documented organisms. Less frequently isolated organisms included *Pseudomonas aeruginosa*, (3 cases), citrobacter species (2 cases), *Morganella morganii* (1 case), *Proteus mirabilis* (1 case), *Aeromonas hydrophila* (1 case), peptostreptococcus species (1 case), *Propionibacterium acne* (1 case), *Provetella melaninogenica* (1 case), and 5 unidentified Gram-negative aerobic bacilli. The total of 107 isolates included 44 strains from the chlorhexidine-alcohol group vs. 63 strains from the povidone-iodine group and comprised 63 Gram-positive aerobic bacterial isolates (22 vs. 41), 25 Gram-negative aerobic bacterial isolates (13 vs. 12), 15 anaerobic bacterial isolates (9 vs. 6), and 4 fungal isolates (0 vs. 4). The 14 excess cases of infection in the povidone-iodine group were primarily accounted for by *S. aureus* and streptococci which caused 22 cases of superficial and deep incisional infection in this group vs. 7 in the chlorhexidine-alcohol group. The 60 cases of infection with identified microbiology occurred after 53 abdominal, 5 thoracic, 1 gynecologic, and 1 urologic surgeries.

† Ten of the 24 strains of *S. aureus* were methicillin-resistant and were proportionately distributed between the two study group (3 in the chlorhexidine-alcohol group and 7 in the povidone-iodine group).

‡ All isolates of *S. epidermidis* and corynebacteria grew from polymicrobial cultures except in 1 case of infection each.

**Table 5 (full). Clinical Adverse Events (Intention-to-Treat Population).**

| Clinical adverse event                         | Chlorhexidine-Alcohol | Povidone-Iodine | Absolute Difference* |               |                      |
|------------------------------------------------|-----------------------|-----------------|----------------------|---------------|----------------------|
|                                                | (N=409)               | (N=440)         | %                    | (95% CI)      | P-Value <sup>†</sup> |
| <b>Adverse events</b>                          |                       |                 |                      |               |                      |
| <b>(≥5% of patients in either study group)</b> |                       |                 |                      |               |                      |
| Patients with adverse events                   | 228 (55.7)            | 256 (58.2)      | -2.4                 | (-9.1 to 4.2) | 0.49                 |
| Type of event                                  |                       |                 |                      |               |                      |
| Abnormal cardiac rhythm or rate                | 25 (6.1)              | 25 (5.7)        | 0.4                  | (-2.7 to 3.6) | 0.88                 |
| Nausea                                         | 30 (7.3)              | 34 (7.7)        | -0.4                 | (-3.9 to 3.2) | 0.90                 |
| Urinary tract infection                        | 23 (5.6)              | 28 (6.4)        | -0.7                 | (-3.9 to 2.5) | 0.67                 |
| Abdominal pain                                 | 21 (5.1)              | 29 (6.6)        | -1.5                 | (-4.6 to 1.7) | 0.39                 |
| Ileus                                          | 19 (4.6)              | 24 (5.5)        | -0.8                 | (-3.8 to 2.1) | 0.64                 |

**Table 5 (full). Clinical Adverse Events (Intention-to-Treat Population).**

|                                            | Chlorhexidine-Alcohol | Povidone-Iodine | Absolute Difference* |               |                      |
|--------------------------------------------|-----------------------|-----------------|----------------------|---------------|----------------------|
|                                            | (N=409)               | (N=440)         | %                    | (95% CI)      | P-Value <sup>†</sup> |
| <b>Clinical adverse event</b>              | <b>no. (%)</b>        | <b>no. (%)</b>  |                      |               |                      |
| Patients with drug-related adverse events‡ | 3 (0.7)               | 3 (0.7)         | 0.1                  | (-1.1 to 1.2) | >0.99                |
| <b>Serious adverse events</b>              |                       |                 |                      |               |                      |
| (≥1% of patients in either study group)    |                       |                 |                      |               |                      |
| Patients with serious adverse events       | 72 (17.6)             | 70 (15.9)       | 1.7                  | (-3.3 to 6.7) | 0.52                 |
| Type of event                              |                       |                 |                      |               |                      |
| Bloodstream infection                      | 11 (2.7)              | 23 (5.2)        | -2.5                 | (-5.1 to 0.1) | 0.08                 |
| Abscess                                    | 6 (1.5)               | 11 (2.5)        | -1.0                 | (-2.9 to 0.8) | 0.33                 |
| Pneumonia                                  | 6 (1.5)               | 9 (2)           | -0.6                 | (-2.3 to 1.2) | 0.61                 |

**Table 5 (full). Clinical Adverse Events (Intention-to-Treat Population).**

| Clinical adverse event                            | Chlorhexidine-Alcohol | Povidone-Iodine    | Absolute Difference* |               |                      |
|---------------------------------------------------|-----------------------|--------------------|----------------------|---------------|----------------------|
|                                                   | (N=409)<br>no. (%)    | (N=440)<br>no. (%) | %                    | (95% CI)      | P-Value <sup>†</sup> |
| Bowel ischemia                                    | 7 (1.7)               | 8 (1.8)            | -0.1                 | (-1.9 to 1.7) | >0.99                |
| Anastomotic leak                                  | 9 (2.2)               | 4 (0.9)            | 1.3                  | (-0.4 to 3.0) | 0.16                 |
| Acute renal failure                               | 5 (1.2)               | 7 (1.6)            | -0.4                 | (-1.9 to 1.2) | 0.77                 |
| Respiratory failure                               | 4 (1)                 | 8 (1.8)            | -0.8                 | (-2.4 to 0.7) | 0.39                 |
| Bowel obstruction                                 | 3 (0.7)               | 5 (1.1)            | -0.4                 | (-1.7 to 0.9) | 0.73                 |
| Patients with serious drug-related adverse events | 0                     | 0                  | ---                  | ---           | ---                  |
| Death                                             | 4 (1)                 | 3 (0.7)            | 0.3                  | (-0.9 to 1.5) | 0.72                 |

**Table 5 (full). Clinical Adverse Events (Intention-to-Treat Population).**

|                        | Chlorhexidine-Alcohol | Povidone-Iodine | Absolute Difference* |          |                      |
|------------------------|-----------------------|-----------------|----------------------|----------|----------------------|
|                        | (N=409)               | (N=440)         | %                    | (95% CI) | P-Value <sup>†</sup> |
| Clinical adverse event | no. (%)               | no. (%)         |                      |          |                      |

\* The absolute difference is shown as the rate in the chlorhexidine-alcohol group minus the rate in the povidone-iodine group.

<sup>†</sup> P-values were calculated with the use of Fisher's exact test.

<sup>‡</sup> Drug-related adverse events included pruritis, erythema, or both around the surgical wound. These events are reported even though the rate was not 5% or higher in either group.

---
